# Supplementary material for: Global multi-scale segmentation of continental and coastal waters from the watersheds to the continental margins
Source: Copernicus journal article supplement (doi:10.5194/hess-17-2029-2013), 2013-05-29
Supplement: Supplementary file 1 [file hess-17-2029-2013-supplement.zip]

Supplement 1: Surface area (in  $10^3 \text{ km}^2$ ) for the continental shelf between the different depth intervals for each COSCAT segment.

| COSCAT | 0 -<br>20m | 21 -<br>50m | 51 -<br>80m | 81 -<br>120m | 121 -<br>150m | 151 -<br>200m | 201 -<br>350m | 351 -<br>500m | 501 -<br>750m | 751 -<br>1000m | Total<br>(1000m) | Shelf<br>Break | Total<br>Shelf |
|--------|------------|-------------|-------------|--------------|---------------|---------------|---------------|---------------|---------------|----------------|------------------|----------------|----------------|
| 0001   | 3.43       | 4.46        | 6.11        | 6.52         | 3.55          | 4.36          | 12.19         | 13.54         | 12.29         | 7.62           | 74.07            | 200            | 28.43          |
| 0002   | 22.05      | 34.64       | 24.45       | 20.76        | 8.90          | 13.11         | 40.57         | 27.94         | 30.26         | 19.05          | 241.74           | 150            | 110.81         |
| 0003   | 16.53      | 14.50       | 15.78       | 9.22         | 2.16          | 3.28          | 6.00          | 4.63          | 6.82          | 8.58           | 87.51            | 150            | 58.19          |
| 0004   | 32.18      | 32.08       | 21.09       | 10.80        | 4.12          | 4.88          | 12.70         | 14.96         | 44.10         | 27.25          | 204.17           | 150            | 100.27         |
| 0005   | 4.11       | 4.72        | 2.78        | 2.44         | 1.48          | 3.11          | 8.85          | 8.78          | 12.69         | 13.76          | 62.72            | 120            | 14.05          |
| 0006   | 11.06      | 13.73       | 6.50        | 7.85         | 4.50          | 8.38          | 17.81         | 9.12          | 14.88         | 14.85          | 108.68           | 150            | 43.64          |
| 0007   | 14.60      | 5.75        | 2.26        | 1.71         | 1.10          | 2.20          | 7.49          | 7.32          | 12.00         | 14.34          | 68.78            | 120            | 24.32          |
| 0008   | 20.18      | 20.86       | 4.04        | 1.49         | 0.65          | 0.99          | 2.63          | 2.27          | 3.68          | 4.08           | 60.88            | 150            | 47.23          |
| 0009   | 7.71       | 13.64       | 10.86       | 4.68         | 1.57          | 2.15          | 3.81          | 3.01          | 4.57          | 4.94           | 56.93            | 150            | 38.45          |
| 0010   | 13.62      | 13.22       | 3.15        | 1.47         | 0.75          | 1.31          | 2.52          | 2.00          | 3.32          | 5.40           | 46.75            | 120            | 31.46          |
| 0011   | 27.74      | 23.06       | 6.91        | 2.95         | 1.48          | 2.48          | 5.30          | 4.59          | 10.24         | 13.33          | 98.09            | 120            | 60.67          |
| 0012   | 6.59       | 12.16       | 18.04       | 38.26        | 18.48         | 11.58         | 17.93         | 14.71         | 20.09         | 18.25          | 176.09           | 350            | 123.04         |
| 0013   | 4.50       | 10.76       | 12.09       | 29.32        | 33.88         | 64.63         | 87.81         | 36.53         | 28.11         | 22.15          | 329.78           | 750            | 307.63         |
| 0014   | 13.09      | 21.78       | 18.13       | 21.90        | 6.59          | 7.64          | 14.85         | 8.52          | 14.03         | 17.57          | 144.11           | 150            | 81.48          |
| 0015   | 13.60      | 9.99        | 7.21        | 3.20         | 0.86          | 0.94          | 2.23          | 2.02          | 3.54          | 4.13           | 47.72            | 150            | 34.87          |
| 0016   | 14.99      | 14.30       | 8.97        | 6.84         | 2.37          | 2.70          | 5.77          | 4.46          | 7.09          | 8.58           | 76.07            | 150            | 47.47          |
| 0017   | 5.59       | 10.41       | 8.62        | 5.77         | 1.40          | 1.10          | 1.97          | 1.56          | 2.41          | 2.56           | 41.38            | 200            | 32.89          |
| 0018   | 24.39      | 34.83       | 15.54       | 7.14         | 2.85          | 2.86          | 5.42          | 3.37          | 5.70          | 7.21           | 109.30           | 200            | 87.60          |
| 0019   | 40.40      | 24.39       | 10.22       | 7.00         | 2.19          | 3.41          | 6.24          | 3.96          | 7.51          | 7.07           | 112.39           | 150            | 84.20          |
| 0020   | 20.41      | 31.46       | 20.97       | 10.18        | 2.64          | 3.48          | 6.75          | 5.11          | 8.71          | 9.73           | 119.45           | 150            | 85.67          |
| 0021   | 3.12       | 10.94       | 12.00       | 18.84        | 7.09          | 3.10          | 5.79          | 5.20          | 8.45          | 8.62           | 83.15            | 200            | 55.08          |
| 0401   | 22.81      | 48.49       | 44.88       | 54.84        | 31.58         | 25.46         | 11.38         | 5.63          | 6.45          | 5.34           | 256.87           | 350            | 239.45         |
| 0402   | 25.07      | 56.04       | 71.21       | 133.23       | 81.94         | 68.47         | 83.56         | 61.79         | 68.74         | 70.95          | 721.00           | 350            | 519.53         |
| 0403   | 97.64      | 211.69      | 109.35      | 98.04        | 53.02         | 22.42         | 45.37         | 20.37         | 9.59          | 5.57           | 673.06           | 200            | 592.16         |
| 0404   | 58.19      | 77.15       | 45.49       | 44.13        | 12.55         | 6.31          | 1.12          | 0.04          | 0.00          | 0.00           | 244.98           | 0              | 244.98         |
| 0405   | 30.42      | 27.97       | 24.19       | 19.78        | 3.46          | 1.63          | 0.35          | 0.00          | 0.00          | 0.00           | 107.81           | 0              | 107.81         |
| 0406   | 10.13      | 12.08       | 6.12        | 1.41         | 0.00          | 0.00          | 0.00          | 0.00          | 0.00          | 0.00           | 29.73            | 0              | 29.73          |
| 0407   | 36.10      | 15.77       | 13.29       | 29.34        | 22.52         | 54.24         | 161.17        | 101.39        | 56.74         | 65.56          | 556.11           | 200            | 171.25         |
| 0408   | 96.40      | 104.81      | 113.57      | 141.76       | 90.68         | 235.30        | 643.49        | 85.32         | 4.87          | 0.46           | 1516.65          | 200            | 782.51         |
| 0409   | 5.92       | 6.43        | 6.07        | 13.95        | 12.55         | 33.60         | 45.41         | 28.87         | 20.01         | 17.35          | 190.16           | 200            | 78.52          |
| 0411   | 43.80      | 2.71        | 1.25        | 0.10         | 0.03          | 0.00          | 0.00          | 0.00          | 0.00          | 0.00           | 47.89            | 0              | 47.89          |
| 0412   | 20.71      | 33.57       | 18.98       | 10.89        | 2.86          | 2.05          | 2.86          | 2.04          | 3.39          | 4.09           | 101.44           | 350            | 91.91          |
| 0413   | 1.82       | 3.59        | 2.70        | 1.27         | 0.45          | 0.59          | 1.34          | 1.21          | 2.15          | 2.58           | 17.70            | 350            | 11.76          |
| 0414   | 7.61       | 14.22       | 18.31       | 21.40        | 8.78          | 12.26         | 35.11         | 26.69         | 32.61         | 20.72          | 197.69           | 150            | 70.30          |
| 0415   | 4.51       | 5.57        | 7.07        | 12.01        | 6.89          | 6.03          | 11.87         | 11.92         | 15.33         | 14.43          | 95.63            | 200            | 42.08          |

|      |        |        |        |        |        |        |        |        |       |        |        |     |        |
|------|--------|--------|--------|--------|--------|--------|--------|--------|-------|--------|--------|-----|--------|
| 0416 | 16.32  | 24.05  | 21.58  | 22.46  | 12.54  | 10.75  | 7.35   | 2.70   | 5.41  | 8.38   | 131.52 | 350 | 115.04 |
| 0417 | 9.89   | 17.61  | 8.47   | 9.83   | 5.04   | 5.25   | 13.85  | 15.43  | 32.28 | 31.27  | 148.92 | 200 | 56.09  |
| 0418 | 7.72   | 12.59  | 17.05  | 22.48  | 8.31   | 6.82   | 12.84  | 12.10  | 19.94 | 23.27  | 143.12 | 200 | 74.97  |
| 0419 | 5.51   | 7.27   | 6.51   | 8.73   | 5.72   | 4.26   | 5.66   | 3.91   | 9.54  | 7.83   | 64.96  | 350 | 43.68  |
| 0501 | 5.47   | 4.76   | 3.72   | 12.46  | 6.60   | 7.08   | 16.83  | 8.99   | 5.83  | 8.04   | 79.77  | 500 | 65.90  |
| 0502 | 9.45   | 11.44  | 11.67  | 19.44  | 13.22  | 51.76  | 152.22 | 36.21  | 12.53 | 8.21   | 326.16 | 500 | 305.42 |
| 0503 | 4.40   | 3.64   | 3.69   | 6.11   | 6.23   | 21.21  | 80.74  | 51.57  | 30.85 | 10.37  | 218.81 | 500 | 177.59 |
| 0504 | 8.51   | 10.28  | 11.30  | 18.42  | 13.13  | 12.22  | 13.54  | 4.58   | 8.11  | 6.81   | 106.88 | 500 | 91.97  |
| 0505 | 12.39  | 11.52  | 9.15   | 20.38  | 13.16  | 34.38  | 86.29  | 55.39  | 57.65 | 19.52  | 319.84 | 500 | 242.68 |
| 0801 | 6.45   | 9.75   | 7.91   | 7.04   | 2.24   | 2.41   | 3.88   | 2.17   | 2.95  | 2.00   | 46.79  | 150 | 33.38  |
| 0802 | 9.96   | 18.23  | 20.55  | 20.19  | 9.28   | 9.82   | 13.83  | 4.87   | 5.90  | 5.42   | 118.05 | 350 | 101.86 |
| 0803 | 3.41   | 3.49   | 2.59   | 3.16   | 1.72   | 2.87   | 5.62   | 2.82   | 4.85  | 6.06   | 36.60  | 80  | 9.49   |
| 0804 | 3.86   | 7.00   | 6.26   | 3.94   | 1.45   | 1.61   | 4.11   | 4.22   | 4.06  | 3.86   | 40.36  | 150 | 22.51  |
| 0805 | 17.77  | 16.30  | 13.11  | 10.55  | 5.99   | 6.89   | 13.17  | 10.07  | 11.09 | 9.76   | 114.70 | 200 | 70.60  |
| 0806 | 7.59   | 8.86   | 11.87  | 18.57  | 5.07   | 4.91   | 10.53  | 6.86   | 9.12  | 6.18   | 89.54  | 200 | 56.86  |
| 0807 | 4.98   | 4.73   | 5.31   | 7.78   | 2.87   | 2.52   | 5.91   | 7.67   | 15.43 | 17.81  | 75.01  | 200 | 28.19  |
| 0808 | 3.15   | 4.98   | 5.64   | 8.47   | 4.85   | 4.62   | 4.33   | 4.62   | 6.50  | 6.20   | 53.36  | 350 | 36.04  |
| 0809 | 11.09  | 17.14  | 13.68  | 17.39  | 14.08  | 17.76  | 22.66  | 5.08   | 3.89  | 3.56   | 126.32 | 350 | 113.80 |
| 0810 | 14.01  | 21.33  | 26.78  | 38.53  | 30.36  | 40.05  | 31.58  | 7.82   | 8.16  | 6.35   | 224.97 | 350 | 202.64 |
| 0811 | 5.46   | 16.73  | 26.00  | 36.64  | 14.35  | 16.62  | 23.65  | 5.55   | 6.97  | 6.72   | 158.69 | 500 | 145.00 |
| 0812 | 45.69  | 119.61 | 125.09 | 87.56  | 31.90  | 9.96   | 12.58  | 7.90   | 9.80  | 7.26   | 457.37 | 350 | 432.40 |
| 0813 | 47.23  | 91.94  | 5.68   | 0.39   | 0.11   | 0.03   | 0.00   | 0.00   | 0.00  | 0.00   | 145.37 | 0   | 145.37 |
| 0814 | 30.08  | 124.29 | 31.33  | 7.62   | 2.07   | 3.17   | 6.40   | 2.47   | 2.70  | 2.74   | 212.86 | 150 | 195.39 |
| 0815 | 55.07  | 63.42  | 32.21  | 22.59  | 14.27  | 21.10  | 63.43  | 91.11  | 20.17 | 11.77  | 395.13 | 120 | 173.29 |
| 0816 | 104.94 | 76.93  | 51.30  | 79.74  | 57.64  | 90.73  | 184.21 | 128.48 | 52.18 | 11.27  | 837.43 | 500 | 773.97 |
| 0817 | 21.44  | 78.08  | 72.03  | 123.03 | 111.73 | 137.14 | 15.35  | 0.00   | 0.00  | 0.00   | 558.80 | 0   | 558.80 |
| 0818 | 25.51  | 34.18  | 9.81   | 4.40   | 0.40   | 0.00   | 0.00   | 0.00   | 0.00  | 0.00   | 74.31  | 0   | 74.31  |
| 0819 | 9.38   | 27.55  | 40.05  | 56.21  | 44.76  | 29.69  | 10.74  | 0.22   | 0.00  | 0.00   | 218.60 | 0   | 218.60 |
| 0820 | 29.79  | 81.46  | 36.10  | 22.56  | 7.00   | 8.05   | 23.76  | 3.24   | 0.00  | 0.00   | 211.96 | 0   | 211.96 |
| 0821 | 9.37   | 18.06  | 16.59  | 22.40  | 17.70  | 27.38  | 51.85  | 13.11  | 3.34  | 0.80   | 180.62 | 500 | 176.47 |
| 0822 | 5.69   | 6.73   | 6.76   | 7.90   | 8.11   | 16.63  | 52.97  | 32.88  | 50.00 | 22.72  | 210.38 | 120 | 27.07  |
| 0823 | 17.12  | 10.06  | 7.11   | 14.89  | 9.72   | 16.69  | 34.18  | 39.56  | 62.59 | 41.00  | 252.93 | 80  | 34.29  |
| 0824 | 8.69   | 14.01  | 9.40   | 12.07  | 22.76  | 47.82  | 53.08  | 19.51  | 19.76 | 4.71   | 211.81 | 120 | 44.17  |
| 0825 | 23.20  | 37.22  | 46.45  | 26.25  | 14.32  | 18.36  | 52.30  | 18.98  | 1.05  | 0.00   | 238.12 | 150 | 147.43 |
| 0826 | 5.85   | 22.86  | 99.56  | 84.44  | 39.13  | 61.30  | 137.97 | 50.03  | 12.87 | 13.61  | 527.62 | 150 | 251.84 |
| 0827 | 51.19  | 90.51  | 87.76  | 85.70  | 42.27  | 58.67  | 42.65  | 17.19  | 6.57  | 6.50   | 489.00 | 150 | 357.43 |
| 0828 | 143.33 | 81.19  | 14.74  | 8.98   | 5.78   | 8.99   | 30.15  | 34.45  | 66.59 | 110.72 | 504.92 | 120 | 248.24 |
| 0830 | 40.10  | 53.16  | 8.27   | 3.38   | 1.91   | 3.09   | 10.33  | 9.46   | 20.10 | 18.59  | 168.37 | 120 | 104.90 |
| 0831 | 56.15  | 27.32  | 8.09   | 5.35   | 3.33   | 4.91   | 14.08  | 10.43  | 16.81 | 17.81  | 164.29 | 120 | 96.91  |

|      |        |        |        |        |        |       |        |       |       |       |        |     |        |
|------|--------|--------|--------|--------|--------|-------|--------|-------|-------|-------|--------|-----|--------|
| 0832 | 49.59  | 75.19  | 35.53  | 20.56  | 7.34   | 8.92  | 16.55  | 10.27 | 14.31 | 15.31 | 253.58 | 150 | 188.22 |
| 0833 | 17.66  | 32.69  | 18.04  | 9.30   | 3.50   | 3.51  | 6.06   | 5.78  | 8.90  | 12.89 | 118.33 | 200 | 84.69  |
| 0834 | 99.99  | 101.01 | 48.49  | 21.13  | 12.19  | 16.79 | 26.23  | 14.77 | 21.84 | 24.49 | 386.94 | 120 | 270.62 |
| 1101 | 7.98   | 7.62   | 6.37   | 2.75   | 1.26   | 1.58  | 4.17   | 3.24  | 5.36  | 6.29  | 46.61  | 150 | 25.98  |
| 1102 | 29.22  | 31.92  | 19.34  | 11.48  | 4.77   | 6.21  | 13.19  | 9.19  | 13.07 | 12.68 | 151.07 | 350 | 116.14 |
| 1103 | 27.63  | 33.44  | 20.58  | 9.09   | 2.18   | 2.21  | 3.71   | 2.69  | 4.27  | 5.34  | 111.15 | 150 | 92.93  |
| 1104 | 112.17 | 82.80  | 48.41  | 34.06  | 8.82   | 8.23  | 12.93  | 8.22  | 11.33 | 11.42 | 338.39 | 200 | 294.49 |
| 1105 | 53.43  | 58.59  | 14.44  | 3.33   | 1.58   | 1.83  | 3.15   | 2.31  | 3.50  | 4.14  | 146.29 | 120 | 129.78 |
| 1106 | 26.70  | 43.45  | 11.12  | 2.01   | 0.67   | 0.98  | 2.56   | 2.28  | 4.17  | 5.05  | 98.99  | 120 | 83.28  |
| 1107 | 33.28  | 60.76  | 60.97  | 54.01  | 36.22  | 23.31 | 19.63  | 14.78 | 18.98 | 16.29 | 338.24 | 350 | 288.18 |
| 1108 | 52.47  | 45.26  | 24.18  | 13.41  | 6.23   | 3.69  | 4.21   | 2.57  | 4.03  | 6.76  | 162.81 | 350 | 149.45 |
| 1109 | 33.09  | 61.82  | 86.05  | 100.58 | 12.63  | 7.94  | 5.87   | 4.43  | 8.39  | 10.01 | 330.80 | 350 | 307.98 |
| 1110 | 16.04  | 40.63  | 99.10  | 262.75 | 130.55 | 90.75 | 82.77  | 61.95 | 51.98 | 37.12 | 873.64 | 350 | 722.58 |
| 1111 | 13.65  | 20.62  | 26.15  | 39.15  | 25.80  | 28.25 | 34.15  | 11.79 | 11.18 | 8.67  | 219.41 | 500 | 199.55 |
| 1112 | 1.41   | 2.67   | 4.12   | 6.35   | 4.73   | 5.57  | 6.14   | 3.52  | 5.08  | 4.61  | 44.20  | 350 | 30.99  |
| 1113 | 1.56   | 2.67   | 3.18   | 5.96   | 4.24   | 3.80  | 7.84   | 6.75  | 12.30 | 13.34 | 61.66  | 200 | 21.42  |
| 1114 | 4.07   | 7.52   | 12.43  | 20.35  | 14.64  | 12.21 | 12.17  | 6.75  | 7.48  | 5.89  | 103.52 | 500 | 90.15  |
| 1115 | 6.76   | 5.32   | 4.79   | 3.98   | 1.20   | 1.10  | 2.58   | 1.91  | 2.19  | 2.23  | 32.05  | 150 | 22.05  |
| 1116 | 8.21   | 6.42   | 7.31   | 6.70   | 2.34   | 2.45  | 4.76   | 3.64  | 7.20  | 6.87  | 55.90  | 150 | 30.98  |
| 1301 | 5.12   | 6.62   | 5.45   | 4.66   | 2.43   | 3.57  | 10.02  | 7.01  | 10.21 | 15.66 | 70.75  | 150 | 24.29  |
| 1303 | 1.84   | 3.36   | 6.32   | 7.21   | 1.92   | 2.83  | 6.37   | 4.86  | 7.61  | 7.84  | 50.17  | 150 | 20.66  |
| 1307 | 127.53 | 86.20  | 34.92  | 74.77  | 34.17  | 39.49 | 60.28  | 21.88 | 2.87  | 0.00  | 482.11 | 500 | 479.24 |
| 1308 | 45.90  | 129.85 | 55.66  | 52.69  | 20.43  | 27.16 | 33.92  | 20.81 | 25.98 | 3.27  | 415.67 | 500 | 386.42 |
| 1309 | 81.27  | 77.22  | 35.41  | 14.95  | 2.80   | 6.98  | 15.99  | 6.15  | 3.98  | 3.72  | 248.46 | 150 | 211.65 |
| 1310 | 147.62 | 109.59 | 39.23  | 12.18  | 2.47   | 3.43  | 2.51   | 1.81  | 2.92  | 2.96  | 324.73 | 150 | 311.10 |
| 1311 | 243.63 | 427.82 | 100.52 | 58.56  | 16.52  | 29.16 | 50.85  | 17.60 | 13.35 | 13.24 | 971.25 | 500 | 944.66 |
| 1312 | 3.19   | 5.28   | 4.67   | 7.67   | 1.87   | 4.81  | 9.70   | 3.02  | 1.70  | 1.72  | 43.63  | 150 | 22.67  |
| 1313 | 10.81  | 146.92 | 133.45 | 25.95  | 14.10  | 30.29 | 42.70  | 23.82 | 26.53 | 14.81 | 469.38 | 500 | 428.04 |
| 1314 | 6.31   | 66.57  | 120.37 | 97.64  | 42.50  | 23.73 | 9.25   | 3.22  | 2.98  | 2.35  | 374.93 | 350 | 366.38 |
| 1315 | 11.18  | 22.58  | 17.45  | 18.95  | 7.71   | 7.50  | 9.37   | 4.58  | 8.32  | 9.13  | 116.77 | 350 | 94.74  |
| 1316 | 2.17   | 5.26   | 5.84   | 7.95   | 4.73   | 4.87  | 8.21   | 3.82  | 5.27  | 4.55  | 52.67  | 500 | 42.86  |
| 1317 | 19.54  | 44.29  | 51.59  | 82.84  | 52.90  | 54.12 | 107.69 | 87.64 | 82.12 | 63.20 | 645.94 | 750 | 582.75 |
| 1318 | 18.27  | 30.24  | 28.31  | 45.41  | 48.24  | 48.32 | 36.81  | 4.79  | 3.42  | 3.61  | 267.42 | 500 | 260.39 |
| 1319 | 12.38  | 25.87  | 26.04  | 21.67  | 15.43  | 14.93 | 21.82  | 10.71 | 22.92 | 29.18 | 200.95 | 500 | 148.85 |
| 1320 | 7.25   | 16.09  | 20.72  | 18.51  | 10.16  | 10.23 | 12.99  | 6.23  | 10.76 | 11.18 | 124.12 | 350 | 95.94  |
| 1321 | 6.56   | 15.66  | 21.79  | 34.58  | 28.75  | 19.46 | 33.57  | 20.31 | 28.41 | 29.16 | 238.25 | 500 | 180.67 |
| 1322 | 6.48   | 14.58  | 10.24  | 13.73  | 10.49  | 9.62  | 19.96  | 13.06 | 18.57 | 20.14 | 136.89 | 500 | 98.17  |
| 1323 | 23.07  | 35.87  | 29.41  | 26.16  | 10.92  | 13.65 | 31.07  | 28.31 | 49.32 | 54.97 | 302.74 | 150 | 125.43 |
| 1324 | 40.13  | 70.21  | 102.79 | 98.05  | 33.27  | 14.26 | 12.63  | 10.73 | 21.28 | 17.51 | 420.86 | 0   | 420.86 |

|      |        |        |        |        |       |       |        |        |        |       |        |      |        |
|------|--------|--------|--------|--------|-------|-------|--------|--------|--------|-------|--------|------|--------|
| 1325 | 43.75  | 37.82  | 1.44   | 0.20   | 0.02  | 0.00  | 0.00   | 0.00   | 0.00   | 0.00  | 83.22  | 0    | 83.22  |
| 1326 | 96.51  | 146.60 | 160.73 | 111.90 | 32.88 | 14.79 | 7.41   | 2.59   | 4.35   | 5.84  | 583.60 | 350  | 570.82 |
| 1327 | 70.27  | 161.93 | 109.95 | 97.88  | 29.18 | 25.04 | 42.19  | 29.29  | 38.52  | 40.16 | 644.41 | 500  | 565.73 |
| 1328 | 56.05  | 192.29 | 116.67 | 74.29  | 17.71 | 9.65  | 11.96  | 7.81   | 12.74  | 14.93 | 514.09 | 200  | 466.64 |
| 1329 | 148.94 | 361.13 | 321.98 | 77.03  | 19.78 | 7.12  | 8.76   | 4.65   | 6.38   | 7.99  | 963.73 | 200  | 935.97 |
| 1330 | 137.84 | 274.31 | 138.51 | 28.20  | 5.53  | 8.61  | 25.87  | 28.23  | 31.54  | 23.56 | 702.20 | 150  | 584.39 |
| 1331 | 48.46  | 53.32  | 37.54  | 29.77  | 13.26 | 18.73 | 43.09  | 24.90  | 30.59  | 21.99 | 321.64 | 150  | 182.35 |
| 1332 | 37.77  | 27.17  | 21.09  | 19.38  | 11.07 | 16.06 | 34.88  | 28.96  | 48.86  | 49.86 | 295.09 | 350  | 167.41 |
| 1333 | 0.72   | 0.42   | 0.35   | 0.41   | 0.27  | 0.36  | 0.91   | 0.80   | 1.46   | 1.82  | 7.53   | 200  | 2.54   |
| 1334 | 26.26  | 36.79  | 28.30  | 18.74  | 8.75  | 12.52 | 30.71  | 26.84  | 47.56  | 54.78 | 291.27 | 150  | 118.85 |
| 1335 | 81.54  | 100.51 | 93.21  | 57.60  | 13.19 | 11.75 | 36.24  | 32.29  | 36.66  | 27.89 | 490.89 | 200  | 357.81 |
| 1336 | 47.45  | 27.22  | 21.42  | 23.40  | 8.22  | 5.51  | 7.78   | 6.54   | 9.06   | 9.62  | 166.22 | 350  | 140.99 |
| 1337 | 37.47  | 24.37  | 13.86  | 9.56   | 4.01  | 5.10  | 7.09   | 4.19   | 6.62   | 7.92  | 120.20 | 150  | 89.27  |
| 1338 | 26.87  | 26.14  | 19.83  | 9.42   | 3.12  | 3.30  | 7.58   | 4.81   | 7.63   | 8.70  | 117.39 | 150  | 85.38  |
| 1339 | 23.91  | 51.73  | 53.81  | 35.25  | 4.57  | 3.98  | 5.80   | 3.07   | 5.43   | 7.42  | 194.97 | 200  | 173.25 |
| 1340 | 19.31  | 23.21  | 18.19  | 15.72  | 3.92  | 2.63  | 4.64   | 2.42   | 3.29   | 3.52  | 96.85  | 200  | 82.98  |
| 1341 | 15.18  | 10.54  | 7.41   | 8.71   | 2.22  | 2.45  | 5.90   | 3.79   | 5.56   | 6.83  | 68.60  | 150  | 44.07  |
| 1342 | 78.03  | 90.87  | 57.02  | 6.56   | 0.22  | 0.09  | 0.04   | 0.00   | 0.00   | 0.00  | 232.82 | 0    | 232.82 |
| 1344 | 33.58  | 27.74  | 16.28  | 8.45   | 3.86  | 5.65  | 13.51  | 11.57  | 34.58  | 31.66 | 186.86 | 150  | 89.90  |
| 1401 | 14.32  | 8.16   | 7.34   | 8.83   | 6.06  | 8.45  | 23.38  | 14.49  | 18.06  | 17.19 | 126.28 | 200  | 53.16  |
| 1402 | 20.85  | 12.14  | 7.36   | 6.34   | 3.86  | 5.53  | 11.85  | 10.11  | 15.46  | 13.35 | 106.84 | 150  | 50.54  |
| 1403 | 159.75 | 99.19  | 46.19  | 23.84  | 10.63 | 12.86 | 47.31  | 32.36  | 30.55  | 22.75 | 485.43 | 500  | 432.13 |
| 1405 | 3.38   | 7.46   | 5.31   | 6.99   | 4.37  | 4.08  | 7.35   | 5.62   | 7.64   | 6.71  | 58.92  | 200  | 31.59  |
| 1406 | 4.53   | 8.72   | 8.69   | 11.87  | 6.96  | 7.60  | 27.83  | 51.88  | 56.25  | 40.59 | 224.91 | 200  | 48.37  |
| 1407 | 5.13   | 11.50  | 10.73  | 21.28  | 15.68 | 18.11 | 32.12  | 68.76  | 177.76 | 95.70 | 456.78 | 350  | 114.56 |
| 1408 | 1.01   | 2.60   | 2.54   | 3.46   | 4.57  | 5.18  | 7.63   | 9.33   | 41.08  | 55.98 | 133.38 | 350  | 26.99  |
| 1409 | 6.16   | 12.10  | 15.85  | 22.11  | 14.98 | 8.92  | 12.89  | 11.09  | 32.80  | 29.55 | 166.46 | 350  | 93.02  |
| 1410 | 13.70  | 30.82  | 34.73  | 25.82  | 15.66 | 8.66  | 9.37   | 4.73   | 6.13   | 5.70  | 155.32 | 350  | 138.77 |
| 1411 | 16.30  | 32.33  | 42.96  | 32.18  | 11.73 | 12.23 | 12.19  | 4.17   | 3.98   | 3.91  | 171.99 | 350  | 159.93 |
| 1412 | 29.27  | 65.36  | 79.47  | 63.88  | 23.74 | 14.66 | 15.63  | 8.36   | 14.56  | 19.13 | 334.06 | 350  | 292.00 |
| 1413 | 21.08  | 33.05  | 19.02  | 16.16  | 9.82  | 10.18 | 9.02   | 6.67   | 23.70  | 23.87 | 172.56 | 350  | 118.33 |
| 1414 | 59.88  | 87.49  | 75.13  | 61.47  | 23.90 | 24.22 | 52.94  | 39.05  | 29.86  | 18.49 | 472.42 | 200  | 332.09 |
| 1415 | 158.46 | 266.92 | 314.87 | 112.36 | 28.70 | 21.30 | 28.22  | 16.01  | 20.16  | 11.34 | 978.33 | 350  | 930.82 |
| 1416 | 113.50 | 162.92 | 71.77  | 25.49  | 4.64  | 3.92  | 5.52   | 4.34   | 6.23   | 6.03  | 404.37 | 150  | 378.32 |
| 1501 | 2.03   | 3.16   | 3.50   | 6.35   | 6.11  | 12.53 | 108.92 | 266.39 | 179.32 | 46.90 | 635.20 | 1000 | 635.20 |
| 1502 | 3.59   | 8.43   | 10.90  | 16.34  | 10.57 | 16.35 | 53.51  | 43.63  | 35.79  | 22.32 | 221.44 | 750  | 199.12 |
| 1503 | 12.10  | 17.14  | 16.77  | 24.09  | 19.31 | 37.36 | 130.10 | 146.12 | 187.20 | 92.23 | 682.43 | 1000 | 682.43 |
| 1504 | 1.70   | 4.27   | 10.13  | 18.35  | 11.51 | 16.09 | 79.12  | 151.79 | 230.48 | 39.45 | 562.90 | 1000 | 562.90 |
| 1505 | 8.25   | 13.70  | 16.24  | 26.01  | 19.06 | 33.34 | 134.15 | 227.57 | 303.47 | 90.40 | 872.19 | 1000 | 872.19 |
