# Supplementary material for: Global multi-scale segmentation of continental and coastal waters from the watersheds to the continental margins
Source: Copernicus journal article supplement (doi:10.5194/hess-17-2029-2013), 2013-05-29
Supplement: Supplementary file 2 [file hess-17-2029-2013-supplement.zip]

Supplement 2: Volume (in 10<sup>3</sup> km<sup>3</sup>) of the continental shelf between the different depth intervals for each COSCAT segment.

| COSCAT | 0 -<br>20m | 21 -<br>50m | 51 -<br>80m | 81 -<br>120m | 121 -<br>150m | 151 -<br>200m | 201 -<br>350m | 351 -<br>500m | 501 -<br>750m | 751 -<br>1000m | Total<br>(1000m) | Shelf<br>Break | Total<br>Shelf |
|--------|------------|-------------|-------------|--------------|---------------|---------------|---------------|---------------|---------------|----------------|------------------|----------------|----------------|
| 0001   | 0.04       | 0.16        | 0.41        | 0.64         | 0.48          | 0.76          | 3.37          | 5.73          | 7.55          | 6.60           | 25.75            | 200            | 2.49           |
| 0002   | 0.21       | 1.25        | 1.58        | 2.07         | 1.20          | 2.30          | 11.17         | 11.64         | 18.81         | 16.55          | 66.79            | 150            | 6.31           |
| 0003   | 0.16       | 0.50        | 1.07        | 0.86         | 0.29          | 0.58          | 1.63          | 1.96          | 4.29          | 7.57           | 18.90            | 150            | 2.88           |
| 0004   | 0.31       | 1.14        | 1.33        | 1.08         | 0.55          | 0.86          | 3.44          | 6.49          | 27.98         | 23.59          | 66.76            | 150            | 4.40           |
| 0005   | 0.04       | 0.17        | 0.18        | 0.24         | 0.20          | 0.55          | 2.43          | 3.77          | 7.89          | 12.09          | 27.55            | 120            | 0.63           |
| 0006   | 0.12       | 0.49        | 0.43        | 0.78         | 0.61          | 1.47          | 4.74          | 3.87          | 9.32          | 12.98          | 34.81            | 150            | 2.43           |
| 0007   | 0.12       | 0.20        | 0.15        | 0.17         | 0.15          | 0.39          | 2.08          | 3.11          | 7.56          | 12.50          | 26.43            | 120            | 0.63           |
| 0008   | 0.24       | 0.68        | 0.25        | 0.15         | 0.09          | 0.17          | 0.72          | 0.96          | 2.31          | 3.56           | 9.13             | 150            | 1.40           |
| 0009   | 0.08       | 0.49        | 0.70        | 0.45         | 0.21          | 0.37          | 1.04          | 1.29          | 2.87          | 4.34           | 11.83            | 150            | 1.93           |
| 0010   | 0.16       | 0.43        | 0.20        | 0.15         | 0.10          | 0.23          | 0.69          | 0.85          | 2.09          | 4.80           | 9.68             | 120            | 0.93           |
| 0011   | 0.34       | 0.76        | 0.44        | 0.29         | 0.20          | 0.44          | 1.43          | 1.96          | 6.49          | 11.75          | 24.09            | 120            | 1.83           |
| 0012   | 0.08       | 0.46        | 1.23        | 3.86         | 2.47          | 1.99          | 4.83          | 6.24          | 12.44         | 15.87          | 49.46            | 350            | 14.92          |
| 0013   | 0.06       | 0.39        | 0.80        | 3.03         | 4.59          | 11.28         | 23.63         | 15.08         | 17.43         | 19.38          | 95.66            | 750            | 76.29          |
| 0014   | 0.17       | 0.79        | 1.19        | 2.17         | 0.89          | 1.34          | 3.92          | 3.62          | 8.81          | 15.54          | 38.42            | 150            | 5.19           |
| 0015   | 0.14       | 0.34        | 0.46        | 0.31         | 0.12          | 0.16          | 0.62          | 0.86          | 2.24          | 3.62           | 8.87             | 150            | 1.37           |
| 0016   | 0.18       | 0.48        | 0.58        | 0.68         | 0.32          | 0.47          | 1.56          | 1.91          | 4.43          | 7.52           | 18.13            | 150            | 2.24           |
| 0017   | 0.07       | 0.38        | 0.56        | 0.56         | 0.19          | 0.19          | 0.53          | 0.66          | 1.50          | 2.24           | 6.88             | 200            | 1.94           |
| 0018   | 0.28       | 1.18        | 1.01        | 0.68         | 0.38          | 0.50          | 1.46          | 1.42          | 3.58          | 6.31           | 16.81            | 200            | 4.04           |
| 0019   | 0.44       | 0.82        | 0.66        | 0.69         | 0.30          | 0.60          | 1.63          | 1.68          | 4.69          | 6.16           | 17.66            | 150            | 2.91           |
| 0020   | 0.19       | 1.10        | 1.36        | 0.97         | 0.36          | 0.61          | 1.82          | 2.17          | 5.48          | 8.55           | 22.61            | 150            | 3.99           |
| 0021   | 0.04       | 0.42        | 0.79        | 1.91         | 0.94          | 0.53          | 1.59          | 2.21          | 5.29          | 7.56           | 21.27            | 200            | 4.62           |
| 0401   | 0.27       | 1.72        | 2.92        | 5.54         | 4.25          | 4.33          | 2.96          | 2.35          | 4.01          | 4.66           | 33.02            | 350            | 21.99          |
| 0402   | 0.32       | 2.00        | 4.72        | 13.38        | 11.00         | 11.77         | 22.47         | 26.30         | 42.57         | 62.29          | 196.81           | 350            | 65.66          |
| 0403   | 1.08       | 7.31        | 7.19        | 9.89         | 7.06          | 3.80          | 12.42         | 8.21          | 5.78          | 4.88           | 67.61            | 200            | 36.32          |
| 0404   | 0.66       | 2.68        | 2.98        | 4.25         | 1.68          | 1.05          | 0.26          | 0.02          | 0.00          | 0.00           | 13.57            | 0              | 13.57          |
| 0405   | 0.32       | 0.95        | 1.58        | 1.91         | 0.45          | 0.28          | 0.08          | 0.00          | 0.00          | 0.00           | 5.56             | 0              | 5.56           |
| 0406   | 0.12       | 0.40        | 0.39        | 0.12         | 0.00          | 0.00          | 0.00          | 0.00          | 0.00          | 0.00           | 1.03             | 0              | 1.03           |
| 0407   | 0.00       | 0.64        | 0.95        | 3.07         | 3.14          | 9.73          | 44.71         | 41.62         | 36.19         | 57.73          | 197.16           | 200            | 16.91          |
| 0408   | 0.79       | 4.12        | 7.22        | 14.21        | 12.56         | 42.20         | 173.07        | 34.09         | 2.59          | 0.40           | 291.24           | 200            | 81.09          |
| 0409   | 0.06       | 0.28        | 0.45        | 1.46         | 1.77          | 6.06          | 12.41         | 12.32         | 12.90         | 15.30          | 63.03            | 200            | 10.09          |
| 0411   | 0.37       | 0.09        | 0.08        | 0.01         | 0.00          | 0.00          | 0.00          | 0.00          | 0.00          | 0.00           | 0.55             | 0              | 0.55           |
| 0412   | 0.25       | 1.17        | 1.20        | 1.06         | 0.38          | 0.36          | 0.77          | 0.87          | 2.12          | 3.61           | 11.79            | 350            | 5.19           |
| 0413   | 0.02       | 0.13        | 0.17        | 0.12         | 0.06          | 0.10          | 0.37          | 0.51          | 1.36          | 2.28           | 5.12             | 350            | 0.97           |
| 0414   | 0.09       | 0.53        | 1.21        | 2.10         | 1.19          | 2.15          | 9.56          | 11.32         | 19.98         | 17.99          | 66.10            | 150            | 5.11           |
| 0415   | 0.05       | 0.20        | 0.47        | 1.20         | 0.93          | 1.04          | 3.25          | 5.04          | 9.56          | 12.64          | 34.39            | 200            | 3.90           |

|      |      |      |      |       |       |       |       |       |       |       |        |     |        |
|------|------|------|------|-------|-------|-------|-------|-------|-------|-------|--------|-----|--------|
| 0416 | 0.17 | 0.86 | 1.43 | 2.25  | 1.68  | 1.87  | 1.82  | 1.14  | 3.45  | 7.31  | 21.99  | 350 | 10.08  |
| 0417 | 0.11 | 0.60 | 0.54 | 0.99  | 0.67  | 0.92  | 3.81  | 6.61  | 20.27 | 27.25 | 61.78  | 200 | 3.84   |
| 0418 | 0.08 | 0.46 | 1.14 | 2.20  | 1.11  | 1.18  | 3.51  | 5.17  | 12.56 | 20.31 | 47.72  | 200 | 6.18   |
| 0419 | 0.06 | 0.26 | 0.42 | 0.89  | 0.77  | 0.73  | 1.51  | 1.68  | 6.00  | 6.74  | 19.07  | 350 | 4.65   |
| 0501 | 0.05 | 0.18 | 0.26 | 1.33  | 0.92  | 1.31  | 4.82  | 4.02  | 3.81  | 7.37  | 24.07  | 500 | 12.89  |
| 0502 | 0.02 | 0.34 | 0.71 | 1.90  | 1.77  | 9.36  | 40.21 | 14.42 | 7.05  | 6.86  | 82.65  | 500 | 68.74  |
| 0503 | 0.05 | 0.12 | 0.21 | 0.57  | 0.81  | 3.70  | 21.93 | 21.10 | 18.09 | 8.78  | 75.36  | 500 | 48.49  |
| 0504 | 0.09 | 0.37 | 0.73 | 1.84  | 1.74  | 2.07  | 3.39  | 1.82  | 5.08  | 5.80  | 22.92  | 500 | 12.04  |
| 0505 | 0.02 | 0.39 | 0.55 | 2.02  | 1.77  | 6.11  | 23.83 | 23.01 | 34.77 | 16.23 | 108.72 | 500 | 57.71  |
| 0801 | 0.07 | 0.34 | 0.52 | 0.69  | 0.30  | 0.42  | 1.03  | 0.92  | 1.80  | 1.76  | 7.85   | 150 | 1.92   |
| 0802 | 0.11 | 0.67 | 1.35 | 2.01  | 1.24  | 1.74  | 3.52  | 2.05  | 3.66  | 4.74  | 21.09  | 350 | 10.64  |
| 0803 | 0.04 | 0.12 | 0.17 | 0.31  | 0.23  | 0.51  | 1.48  | 1.19  | 3.05  | 5.33  | 12.43  | 80  | 0.33   |
| 0804 | 0.04 | 0.26 | 0.40 | 0.38  | 0.20  | 0.28  | 1.14  | 1.79  | 2.52  | 3.38  | 10.38  | 150 | 1.27   |
| 0805 | 0.18 | 0.57 | 0.87 | 1.04  | 0.81  | 1.20  | 3.57  | 4.25  | 6.87  | 8.54  | 27.89  | 200 | 4.66   |
| 0806 | 0.08 | 0.31 | 0.80 | 1.83  | 0.68  | 0.86  | 2.82  | 2.90  | 5.68  | 5.41  | 21.36  | 200 | 4.56   |
| 0807 | 0.04 | 0.17 | 0.35 | 0.77  | 0.38  | 0.44  | 1.61  | 3.32  | 9.64  | 15.57 | 32.29  | 200 | 2.15   |
| 0808 | 0.03 | 0.18 | 0.37 | 0.85  | 0.65  | 0.79  | 1.16  | 1.95  | 4.06  | 5.45  | 15.50  | 350 | 4.03   |
| 0809 | 0.13 | 0.60 | 0.90 | 1.75  | 1.91  | 3.09  | 5.80  | 2.05  | 2.41  | 3.12  | 21.76  | 350 | 14.17  |
| 0810 | 0.16 | 0.75 | 1.78 | 3.89  | 4.09  | 6.99  | 7.98  | 3.26  | 5.05  | 5.54  | 39.50  | 350 | 25.64  |
| 0811 | 0.07 | 0.61 | 1.76 | 3.60  | 1.94  | 2.92  | 5.89  | 2.33  | 4.30  | 5.89  | 29.31  | 500 | 19.12  |
| 0812 | 0.63 | 4.18 | 8.28 | 8.56  | 4.24  | 1.70  | 3.37  | 3.35  | 6.04  | 6.35  | 46.69  | 350 | 30.96  |
| 0813 | 0.66 | 2.96 | 0.32 | 0.03  | 0.01  | 0.00  | 0.00  | 0.00  | 0.00  | 0.00  | 3.98   | 0   | 3.98   |
| 0814 | 0.35 | 4.88 | 1.87 | 0.76  | 0.29  | 0.58  | 1.77  | 1.11  | 1.78  | 2.48  | 15.87  | 150 | 8.14   |
| 0815 | 0.49 | 2.36 | 2.12 | 2.35  | 2.01  | 3.80  | 18.11 | 37.85 | 12.60 | 10.79 | 92.49  | 120 | 7.32   |
| 0816 | 0.37 | 2.81 | 3.48 | 8.01  | 7.80  | 15.85 | 49.38 | 54.57 | 30.61 | 10.17 | 183.07 | 500 | 142.28 |
| 0817 | 0.30 | 2.67 | 4.74 | 12.52 | 15.06 | 23.84 | 3.22  | 0.00  | 0.00  | 0.00  | 62.36  | 0   | 62.36  |
| 0818 | 0.33 | 1.15 | 0.59 | 0.42  | 0.05  | 0.00  | 0.00  | 0.00  | 0.00  | 0.00  | 2.55   | 0   | 2.55   |
| 0819 | 0.11 | 1.01 | 2.61 | 5.75  | 6.04  | 5.00  | 2.62  | 0.09  | 0.00  | 0.00  | 23.24  | 0   | 23.24  |
| 0820 | 0.40 | 2.75 | 2.26 | 2.13  | 0.91  | 1.40  | 5.98  | 1.30  | 0.00  | 0.00  | 17.13  | 0   | 17.13  |
| 0821 | 0.11 | 0.64 | 1.07 | 2.26  | 2.40  | 4.80  | 13.64 | 5.29  | 2.02  | 0.66  | 32.86  | 500 | 30.18  |
| 0822 | 0.08 | 0.23 | 0.41 | 0.75  | 1.08  | 2.88  | 14.45 | 14.07 | 30.66 | 19.59 | 84.21  | 120 | 1.48   |
| 0823 | 0.00 | 0.24 | 0.48 | 1.47  | 1.28  | 2.86  | 9.22  | 16.58 | 38.88 | 35.60 | 105.69 | 80  | -0.20  |
| 0824 | 0.10 | 0.49 | 0.61 | 1.23  | 3.13  | 8.31  | 13.65 | 8.14  | 11.68 | 4.13  | 51.47  | 120 | 2.43   |
| 0825 | 0.27 | 1.33 | 2.98 | 2.57  | 1.93  | 3.21  | 14.09 | 7.94  | 0.54  | 0.00  | 34.86  | 150 | 9.08   |
| 0826 | 0.07 | 0.91 | 6.77 | 8.17  | 5.30  | 10.69 | 37.60 | 20.79 | 7.95  | 11.97 | 110.23 | 150 | 21.22  |
| 0827 | 0.52 | 3.24 | 5.70 | 8.42  | 5.71  | 10.23 | 10.31 | 7.23  | 4.10  | 5.70  | 61.15  | 150 | 23.59  |
| 0828 | 1.26 | 2.62 | 0.93 | 0.90  | 0.78  | 1.58  | 8.23  | 14.82 | 41.47 | 94.46 | 167.06 | 120 | 5.71   |
| 0830 | 0.53 | 1.67 | 0.51 | 0.34  | 0.26  | 0.54  | 2.84  | 4.04  | 12.64 | 16.18 | 39.54  | 120 | 3.04   |
| 0831 | 0.49 | 0.90 | 0.51 | 0.53  | 0.45  | 0.86  | 3.84  | 4.44  | 10.46 | 15.70 | 38.20  | 120 | 2.44   |

|      |      |       |      |       |       |       |       |       |       |       |        |     |        |
|------|------|-------|------|-------|-------|-------|-------|-------|-------|-------|--------|-----|--------|
| 0832 | 0.54 | 2.70  | 2.26 | 2.01  | 0.99  | 1.55  | 4.47  | 4.30  | 8.98  | 13.42 | 41.22  | 150 | 8.50   |
| 0833 | 0.20 | 1.15  | 1.13 | 0.91  | 0.47  | 0.61  | 1.63  | 2.45  | 5.55  | 11.32 | 25.42  | 200 | 4.46   |
| 0834 | 1.02 | 3.34  | 3.05 | 2.07  | 1.64  | 2.93  | 6.86  | 6.20  | 13.75 | 21.45 | 62.31  | 120 | 9.47   |
| 1101 | 0.08 | 0.27  | 0.41 | 0.27  | 0.17  | 0.28  | 1.14  | 1.36  | 3.37  | 5.52  | 12.86  | 150 | 1.20   |
| 1102 | 0.36 | 1.05  | 1.28 | 1.11  | 0.65  | 1.07  | 3.53  | 3.91  | 8.14  | 11.08 | 32.16  | 350 | 9.03   |
| 1103 | 0.28 | 1.10  | 1.32 | 0.87  | 0.29  | 0.39  | 0.98  | 1.15  | 2.68  | 4.72  | 13.78  | 150 | 3.86   |
| 1104 | 1.22 | 2.81  | 3.13 | 3.27  | 1.19  | 1.42  | 3.45  | 3.48  | 7.06  | 10.08 | 37.11  | 200 | 13.04  |
| 1105 | 0.65 | 1.92  | 0.89 | 0.33  | 0.21  | 0.32  | 0.85  | 0.97  | 2.19  | 3.62  | 11.94  | 120 | 3.78   |
| 1106 | 0.35 | 1.49  | 0.68 | 0.20  | 0.09  | 0.17  | 0.70  | 0.97  | 2.63  | 4.45  | 11.72  | 120 | 2.70   |
| 1107 | 0.39 | 2.20  | 3.91 | 5.46  | 4.87  | 3.96  | 5.19  | 6.27  | 11.71 | 14.32 | 58.29  | 350 | 25.99  |
| 1108 | 0.60 | 1.49  | 1.54 | 1.32  | 0.84  | 0.63  | 1.10  | 1.09  | 2.53  | 6.01  | 17.15  | 350 | 7.52   |
| 1109 | 0.40 | 2.27  | 5.79 | 9.58  | 1.68  | 1.34  | 1.54  | 1.87  | 5.32  | 8.82  | 38.61  | 350 | 22.60  |
| 1110 | 0.19 | 1.50  | 6.82 | 26.49 | 17.51 | 15.55 | 22.26 | 26.16 | 32.06 | 32.42 | 180.96 | 350 | 90.32  |
| 1111 | 0.15 | 0.75  | 1.73 | 3.95  | 3.48  | 4.90  | 8.86  | 4.91  | 6.89  | 7.59  | 43.21  | 500 | 28.73  |
| 1112 | 0.02 | 0.09  | 0.28 | 0.64  | 0.64  | 0.95  | 1.63  | 1.47  | 3.16  | 4.04  | 12.92  | 350 | 4.25   |
| 1113 | 0.02 | 0.10  | 0.21 | 0.61  | 0.57  | 0.66  | 2.14  | 2.88  | 7.76  | 11.67 | 26.61  | 200 | 2.17   |
| 1114 | 0.05 | 0.27  | 0.84 | 2.05  | 2.00  | 2.08  | 3.22  | 2.84  | 4.60  | 5.17  | 23.13  | 500 | 13.36  |
| 1115 | 0.07 | 0.19  | 0.32 | 0.39  | 0.16  | 0.19  | 0.70  | 0.80  | 1.37  | 1.95  | 6.14   | 150 | 1.13   |
| 1116 | 0.08 | 0.23  | 0.48 | 0.66  | 0.32  | 0.43  | 1.28  | 1.55  | 4.49  | 5.96  | 15.47  | 150 | 1.76   |
| 1301 | 0.06 | 0.23  | 0.36 | 0.46  | 0.33  | 0.63  | 2.68  | 2.94  | 6.44  | 13.85 | 27.98  | 150 | 1.44   |
| 1303 | 0.02 | 0.12  | 0.42 | 0.70  | 0.26  | 0.49  | 1.72  | 2.07  | 4.80  | 6.86  | 17.46  | 150 | 1.53   |
| 1307 | 1.01 | 2.83  | 2.35 | 7.49  | 4.70  | 6.88  | 16.58 | 9.21  | 1.51  | 0.00  | 52.55  | 500 | 51.04  |
| 1308 | 0.41 | 4.94  | 3.46 | 5.26  | 2.77  | 4.79  | 9.35  | 8.50  | 15.48 | 2.93  | 57.89  | 500 | 39.49  |
| 1309 | 0.90 | 2.82  | 2.26 | 1.43  | 0.41  | 1.31  | 4.53  | 2.62  | 2.66  | 3.46  | 22.41  | 150 | 7.82   |
| 1310 | 2.01 | 3.57  | 2.50 | 1.21  | 0.36  | 0.65  | 0.78  | 0.87  | 2.00  | 2.78  | 16.72  | 150 | 9.64   |
| 1311 | 3.07 | 15.33 | 6.39 | 5.74  | 2.28  | 5.28  | 13.49 | 7.31  | 8.59  | 11.93 | 79.41  | 500 | 58.88  |
| 1312 | 0.03 | 0.22  | 0.31 | 0.78  | 0.27  | 0.90  | 2.48  | 1.32  | 1.19  | 1.63  | 9.13   | 150 | 1.61   |
| 1313 | 0.12 | 6.26  | 7.71 | 2.58  | 1.93  | 5.43  | 11.33 | 10.04 | 16.23 | 12.92 | 74.56  | 500 | 45.41  |
| 1314 | 0.09 | 2.62  | 7.78 | 9.49  | 5.69  | 3.99  | 2.33  | 1.35  | 1.82  | 2.05  | 37.21  | 350 | 31.99  |
| 1315 | 0.14 | 0.80  | 1.14 | 1.87  | 1.03  | 1.30  | 2.45  | 1.94  | 5.23  | 8.05  | 23.95  | 350 | 8.73   |
| 1316 | 0.02 | 0.19  | 0.39 | 0.79  | 0.64  | 0.85  | 2.18  | 1.61  | 3.27  | 3.98  | 13.92  | 500 | 6.67   |
| 1317 | 0.00 | 1.59  | 3.39 | 8.44  | 7.09  | 9.47  | 28.91 | 37.32 | 49.86 | 55.69 | 202.00 | 750 | 146.07 |
| 1318 | 0.20 | 1.08  | 1.87 | 4.57  | 6.60  | 8.30  | 9.09  | 1.95  | 2.13  | 3.20  | 38.98  | 500 | 33.65  |
| 1319 | 0.15 | 0.92  | 1.67 | 2.20  | 2.08  | 2.59  | 5.72  | 4.53  | 14.53 | 25.34 | 59.73  | 500 | 19.86  |
| 1320 | 0.08 | 0.58  | 1.37 | 1.85  | 1.37  | 1.79  | 3.38  | 2.64  | 6.80  | 9.75  | 29.61  | 350 | 10.42  |
| 1321 | 0.07 | 0.56  | 1.44 | 3.49  | 3.84  | 3.37  | 9.00  | 8.55  | 17.85 | 25.29 | 73.48  | 500 | 30.34  |
| 1322 | 0.08 | 0.50  | 0.67 | 1.37  | 1.41  | 1.68  | 5.34  | 5.53  | 11.57 | 17.73 | 45.88  | 500 | 16.58  |
| 1323 | 0.26 | 1.25  | 1.91 | 2.58  | 1.47  | 2.39  | 8.50  | 12.04 | 30.92 | 48.13 | 109.45 | 150 | 7.48   |
| 1324 | 0.47 | 2.60  | 6.82 | 9.58  | 4.44  | 2.40  | 3.43  | 4.50  | 13.70 | 14.80 | 62.75  | 0   | 62.75  |

|      |      |       |       |       |      |      |       |        |        |       |        |      |        |
|------|------|-------|-------|-------|------|------|-------|--------|--------|-------|--------|------|--------|
| 1325 | 0.57 | 1.03  | 0.09  | 0.02  | 0.00 | 0.00 | 0.00  | 0.00   | 0.00   | 0.00  | 1.70   | 0    | 1.70   |
| 1326 | 1.25 | 5.20  | 10.63 | 10.99 | 4.40 | 2.49 | 1.90  | 1.09   | 2.75   | 5.16  | 45.86  | 350  | 36.86  |
| 1327 | 0.86 | 5.66  | 7.12  | 9.55  | 3.92 | 4.34 | 11.41 | 12.26  | 23.98  | 35.03 | 114.14 | 500  | 55.13  |
| 1328 | 0.67 | 6.81  | 7.56  | 7.25  | 2.38 | 1.64 | 3.21  | 3.32   | 7.98   | 13.14 | 53.96  | 200  | 26.31  |
| 1329 | 1.86 | 12.98 | 20.48 | 7.30  | 2.64 | 1.22 | 2.30  | 1.97   | 4.02   | 6.94  | 61.70  | 200  | 46.47  |
| 1330 | 1.65 | 9.67  | 8.69  | 2.66  | 0.74 | 1.52 | 7.08  | 11.96  | 19.19  | 20.70 | 83.86  | 150  | 23.41  |
| 1331 | 0.50 | 1.88  | 2.45  | 2.94  | 1.79 | 3.29 | 11.53 | 10.58  | 18.82  | 19.18 | 72.96  | 150  | 9.56   |
| 1332 | 0.32 | 0.97  | 1.38  | 1.93  | 1.50 | 2.81 | 9.46  | 12.31  | 30.70  | 43.61 | 104.99 | 350  | 18.37  |
| 1333 | 0.01 | 0.02  | 0.02  | 0.04  | 0.04 | 0.06 | 0.25  | 0.34   | 0.92   | 1.61  | 3.30   | 200  | 0.19   |
| 1334 | 0.28 | 1.32  | 1.82  | 1.84  | 1.18 | 2.19 | 8.37  | 11.41  | 29.96  | 48.19 | 106.57 | 150  | 6.45   |
| 1335 | 0.91 | 3.59  | 6.07  | 5.59  | 1.77 | 2.04 | 10.03 | 13.72  | 22.28  | 24.55 | 90.55  | 200  | 19.97  |
| 1336 | 0.44 | 0.93  | 1.42  | 2.31  | 1.10 | 0.95 | 2.12  | 2.76   | 5.70   | 8.45  | 26.18  | 350  | 9.28   |
| 1337 | 0.39 | 0.84  | 0.88  | 0.95  | 0.54 | 0.89 | 1.88  | 1.78   | 4.15   | 6.97  | 19.29  | 150  | 3.61   |
| 1338 | 0.29 | 0.95  | 1.25  | 0.92  | 0.42 | 0.58 | 2.07  | 2.00   | 4.77   | 7.63  | 20.88  | 150  | 3.83   |
| 1339 | 0.31 | 1.76  | 3.62  | 3.31  | 0.61 | 0.69 | 1.53  | 1.30   | 3.44   | 6.56  | 23.13  | 200  | 10.30  |
| 1340 | 0.22 | 0.78  | 1.19  | 1.52  | 0.52 | 0.45 | 1.22  | 1.02   | 2.06   | 3.10  | 12.09  | 200  | 4.69   |
| 1341 | 0.18 | 0.35  | 0.48  | 0.86  | 0.30 | 0.43 | 1.60  | 1.61   | 3.47   | 6.06  | 15.33  | 150  | 2.17   |
| 1342 | 0.92 | 3.11  | 3.63  | 0.58  | 0.03 | 0.01 | 0.01  | 0.00   | 0.00   | 0.00  | 8.30   | 0    | 8.30   |
| 1344 | 0.32 | 0.97  | 1.05  | 0.83  | 0.52 | 0.99 | 3.69  | 4.97   | 21.95  | 27.54 | 62.83  | 150  | 3.70   |
| 1401 | 0.13 | 0.29  | 0.49  | 0.88  | 0.82 | 1.49 | 6.38  | 6.08   | 11.27  | 15.02 | 42.84  | 200  | 4.10   |
| 1402 | 0.17 | 0.42  | 0.48  | 0.64  | 0.52 | 0.97 | 3.19  | 4.33   | 9.49   | 11.71 | 31.92  | 150  | 2.23   |
| 1403 | 1.45 | 3.33  | 2.93  | 2.36  | 1.43 | 2.26 | 13.09 | 13.59  | 18.52  | 19.99 | 78.94  | 500  | 40.43  |
| 1405 | 0.04 | 0.28  | 0.34  | 0.70  | 0.59 | 0.70 | 1.98  | 2.40   | 4.73   | 5.90  | 17.68  | 200  | 2.66   |
| 1406 | 0.06 | 0.31  | 0.58  | 1.18  | 0.94 | 1.32 | 7.93  | 22.16  | 34.22  | 35.53 | 104.23 | 200  | 4.40   |
| 1407 | 0.07 | 0.41  | 0.71  | 2.17  | 2.13 | 3.12 | 8.89  | 30.13  | 108.99 | 83.57 | 240.18 | 350  | 17.50  |
| 1408 | 0.01 | 0.10  | 0.17  | 0.35  | 0.62 | 0.91 | 1.99  | 4.16   | 25.83  | 49.39 | 83.53  | 350  | 4.15   |
| 1409 | 0.07 | 0.44  | 1.05  | 2.23  | 2.02 | 1.53 | 3.45  | 4.91   | 20.37  | 25.34 | 61.40  | 350  | 10.79  |
| 1410 | 0.15 | 1.16  | 2.22  | 2.58  | 2.12 | 1.48 | 2.44  | 1.99   | 3.82   | 5.00  | 22.96  | 350  | 12.15  |
| 1411 | 0.19 | 1.16  | 2.89  | 3.13  | 1.58 | 2.12 | 3.16  | 1.74   | 2.47   | 3.43  | 21.88  | 350  | 14.23  |
| 1412 | 0.35 | 2.45  | 5.23  | 6.24  | 3.20 | 2.52 | 4.08  | 3.53   | 9.20   | 16.91 | 53.72  | 350  | 24.08  |
| 1413 | 0.21 | 1.23  | 1.21  | 1.62  | 1.33 | 1.75 | 2.36  | 2.90   | 15.03  | 20.87 | 48.52  | 350  | 9.71   |
| 1414 | 0.69 | 3.17  | 4.86  | 6.03  | 3.23 | 4.23 | 14.26 | 16.54  | 18.11  | 16.21 | 87.33  | 200  | 22.21  |
| 1415 | 2.01 | 9.86  | 19.64 | 10.98 | 3.84 | 3.66 | 7.45  | 6.71   | 12.56  | 9.81  | 86.53  | 350  | 57.44  |
| 1416 | 1.30 | 5.98  | 4.38  | 2.48  | 0.62 | 0.68 | 1.49  | 1.83   | 3.91   | 5.19  | 27.88  | 150  | 14.78  |
| 1501 | 0.04 | 0.15  | 0.25  | 0.67  | 0.85 | 2.24 | 32.31 | 113.18 | 107.56 | 40.44 | 297.68 | 1000 | 297.68 |
| 1502 | 0.13 | 0.46  | 0.90  | 1.90  | 1.62 | 3.20 | 15.68 | 19.33  | 23.43  | 21.20 | 87.85  | 750  | 66.65  |
| 1503 | 0.27 | 0.81  | 1.35  | 2.80  | 2.89 | 7.04 | 37.49 | 63.78  | 116.91 | 80.64 | 313.98 | 1000 | 313.98 |
| 1504 | 0.02 | 0.18  | 0.68  | 1.86  | 1.58 | 2.87 | 22.99 | 66.23  | 137.42 | 33.93 | 267.75 | 1000 | 267.75 |
| 1505 | 0.20 | 0.68  | 1.26  | 2.88  | 2.79 | 6.23 | 38.92 | 99.12  | 185.70 | 78.46 | 416.24 | 1000 | 416.24 |
